# Supplementary material for: Configurational ordering of a cationic dinuclear triple helicate by chiral TRISPHAT anions
Source: Royal Society of Chemistry journal article supplement (doi:10.1039/b108110a), 2001-01-01
Supplement: b108110a.doc [file b108110a.doc]

# Configurational Ordering of a Cationic Dinuclear Triple Helicate by Chiral TRISPHAT anions.

Jérôme Lacour*, Jonathan J. Jodry, David Monchaud

**General Information.** All reactions were carried out under an atmosphere of dry nitrogen using Schlenk lines techniques with magnetic stirring, unless otherwise stated. Solvents were dried and distilled prior to use. Chloroform (Fluka) and CDCl3 were filtered on basic alumina before use. Deionized water was used. Analytical thin layer chromatography was performed on Macherey-Nagel 0.25 mm silica gel plates. Visualization was accomplished with UV light. 1H and 31P NMR spectra were recorded on Bruker AMX-400 (400 MHz) spectrometers. Chemical shifts are given in ppm. 1H chemical shifts were reported relative to Me4Si. 31P chemical shifts were reported relative to H3PO4. Infrared spectra were recorded on a Perkin-Elmer 1600 FT-IR spectrophotometer by using NaCl cells or KBr disks. The absorption is indicated in wave numbers (cm-1) and the intensities are represented as strong (s), medium (m) and weak (w). Optical rotations were determined on a Perkin Elmer 241 polarimeter in a thermostated (20°C) 10 cm long microcell with sodium or mercury lamps and are reported as follows: (c g/100 mL, solvent). UV spectra were recorded on a UVIKON 860 spectrometer in a 1 cm quartz cell; max were given in nm and molar adsorption coefficient  in mol-1.L.cm-1. Circular dichroism spectra were recorded on a JASCO J-715 spectropolarimeter in a 1 cm quartz cell;  were given in nm and molar circular-dichroic absorption  in mol-1.L.cm-1. Electronspray mass spectra were obtained on a Finnigan SSQ 7000 spectrometer. Melting points (M.p.) were determined on a Stuart Scientific SMP3 melting point apparatus and are uncorrected. When a mixture of diastereomers is present, 1H NMR data for the major (M) and *minor* (*m*) isomers will be presented in regular and *italic* formats respectively.

**Compound [3][-1]4**. In a 25 mL conical flask equipped with a condenser, a suspension of 25.3 mg (90.0 mol, 2.0 equiv.) of Co(SO4)2·7H2O and 49.5 mg (135 mol, 3.0 equiv.) of the ligand 1,2-bis(4’-methyl-2,2’-bipyridyl-4-yl)ethane **3** in a mixture of water and ethanol (50:50, 10 mL) was stirred at room temperature for 30 minutes. The resulting yellow solution was diluted with water to a 100 mL volume. A solution of 191 mg of [cinchonidinium][-**1**] salt (4.0 equiv.) in CH2Cl2 and acetone (90:10, 100 mL) was then added. The resulting biphasic mixture was stirred vigorously for 60 minutes. Coloration was observed only in the organic layer, but a slight suspension was found in the aqueous one. After separation of the layers, the organic layer was filtered to remove the traces of the suspension, washed with H2O (2 x 60 mL) and dried (Na2SO4) to afford a yellow powder. Chemically pure product was obtained by dissolving the crude product in a mixture of 5% DMSO/CH2Cl2. Slow diffusion of pentane led to the precipitation of 136.4 mg (318 mol, 71%) of [**3**][-**1**]4 as a yellow powder: **M.p.** > 100°C (decompose); **1H NMR** (600 MHz, 20% [D6]DMSO/CDCl3, 10-3 m, d.e.=82%, Major (M) and minor (m) diastereomers)  80.35 (6H, M) + 79.84 (6H, m), 74.99 (6H, m) + 74.34 (6H, M), 40.69 (6H, m) + 39.72 (6H, M), 30.52 (6H, M) + 29.69 (6H, m), -1.86 (18H, m, s, C**H**3) + -2.11 (18H, M, s, C**H**3); Other protons cannot be distinguished due to a signal broadening; **IR** (KBr) 3430 (w), 2925 (w), 1615 (w), 1452 (s), 1390 (m), 1302 (w), 1236 (w), 992 (m), 826 (s) 719 (w).

**Compound [4][-1]2**. Prepared in a similar manner using [cinchonidinium][-**1**] (227.2 mg, 213.4 mol, 2.0 equiv.) to afford, after extraction and purification by chromatography (SiO2, CH2Cl2), 211.3 mg (92%) as a yellow colored solid. ***R*** = 0.57 (CH2Cl2); **1H NMR** (400 MHz, 5% [D6]DMSO/CDCl3, d.e.>97%, diastereomer [-**4**][-**1**]2)  157.69 (br, 6H; **H**(6)), 67.85 (6H; **H**(5) or **H**(3)), 50.18 (6H; **H**(3) or **H**(5)), -0.91 (s, 18H; C**H**3); **1H NMR** spectra in mixtures of [D6]DMSO/CDCl3, see below Table 1; **31P NMR** (162 MHz, 30% [D6]DMSO/CDCl3)  -82.0; **IR** (KBr) 2925 (w), 2853 (w), 1614 (m), 1452 (s), 1390 (w), 1303 (m), 1236 (m), 993 (s), 825 (s), 720 (m), 675 (s), 621 (w); **UV/Vis** (0.1% DMSO/CHCl3, 4.51·10-6 m) max () 241 (1.1·105), 300.0 (6.8·104); **CD** (0.1% DMSO/CHCl3, 4.51·10-6 m, 19.3°C)  () 246.0 (-193), 283.0 (38), 308.0 (-64); = -804, = -845, = -969, = -1907 and = -3536 (c = 0.010, 0.1% DMSO/CHCl3); **MS** (ES) (+) 1379.9 ([Co(dmbp)3]2+[TRISPHAT]-), 1195.3 ([Co(dmbp)2]2+ [TRISPHAT]-), 213.4 ([Co(dmbp)2]2+); (-) 768.3 ([TRISPHAT]-).

| % DMSO | 5 | 7.5 | 10 | 12.5 | 15 | 20 | 30 |
| --- | --- | --- | --- | --- | --- | --- | --- |
| H6 Maj | 157.690 | 149.586 | 141.439 | 133.524 | 126.517 | 116.493 | 104.760 |
| H6 min |  |  |  | 93.276 | 92.750 | 92.195 | 91.584 |
| H5 or H3 Maj | 67.848 | 69.446 | 71.196 | 72.740 | 74.193 | 76.216 | 78.497 |
| H5 or H3 min |  |  | 81.383 | 81.465 | 81.494 | 81.483 | 81.317 |
| H3 or H5 Maj | 50.179 | 49.372 | 48.579 | 47.864 | 47.213 | 46.319 | 45.337 |
| H3 or H5 min |  | 45.364 | 45.286 | 45.181 | 45.103 | 44.931 | 44.646 |
| H(Me) Maj | -0.910 | -0.868 | -0.826 | -0.792 | -0.752 | -0.706 | -0.670 |
| H(Me) min |  | 0.179 | 0.108 | 0.055 | 0.002 | -0.113 | -0.317 |
| d.e. | >96% | >96% | 92% | 87% | 79% | 60% | 33% |
| d.r. | >49:1 | >49:1 | 22.5 | 13.9 | 8.6 | 4.0 | 2.0 |

Table 1: Complex [4][-1]2. Chemical shifts in 1H NMR for various mixtures of [D6]DMSO in CDCl3.

**Fig. 1** 1H NMR (400 MHz) of [**4**][-**1**]2 (10-3 M, parts) in various amounts of [D6]DMSO in CDCl3. (a, d, e) and (b, c, f) correspond to protons (H6, H5 or H3, H3 or H5) for complexes [-**4**][-**1**]2 and [-**4**][-**1**]2 respectively.
